# Supplementary material
Source: Elsevier journal article supplement (https://www.sciencedirect.com/science/article/pii/S0021755715000984)
Supplement: mmc1 [file S0021755715000984:mmc1.docx]

**ANEXO A:** Questionário ANSG para lactentes e crianças menores de dois anos

1. a) Qual era o peso de seu filho ao nascer?
   1. Qual era o comprimento de seu filho ao nascer?
   2. Qual foi a última data em que seu filho foi medido por profissional da saúde?
   3. Naquela ocasião, qual era o peso de seu filho?
   4. Naquela ocasião, qual era o comprimento ou altura de seu filho?
   5. Qual a altura da mãe da criança e do pai?
2. a) Qual o leite que seu filho tomou? (assinalar todas as opções possíveis)

Leite materno

Fórmula

Leite de vaca (ou cabra) homogeneizado, integral, 3,25% gordura 2% 1% Desnatado

Outro leite

b) Como alimenta seu filho? (assinalar todos os que se aplicam)

amamentação no peito

mamadeira

xícara

sonda

1. Amamentação
   1. É a primeira vez que amamenta? Não Sim
   2. Você alterna o seio em que inicia a amamentação? Não Sim
   3. Em um período de 24 horas, quantas vezes você amamenta seu filho?
   4. Quanto tempo leva para amamentar seu filho? (em minutos)
   5. Como sabe que seu filho está com fome? Satisfeito?
   6. Você tem dúvidas ou preocupações com a amamentação ao peito? Não Sim (Explicar)

Alimentação por mamadeira ou sonda

###### Qual é o nome do alimento ou fórmula que dá a seu filho?

###### Como você prepara o alimento ou fórmula? (Quais as quantidades de leite materno extraído, fórmula, água ou outros ingredientes adicionados?)

###### Em um período de 24 horas, quantas vezes você alimenta seu filho?

###### Qual é a quantidade média que seu filho ingere cada vez? (em ml)

###### Quanto tempo você leva para alimentar seu filho? (em minutos)

###### Você tem alguma preocupação relacionada à mamadeira ou alimentação por sonda? Não Sim (Explicar)

Leite de Vaca ou Outros Tipos de Leite

a) Qual a quantidade média que seu filho toma por dia? (em ml)

1. Você oferece outras coisas para seu filho tomar?

Não

Sim → Por favor, preencha as perguntas a seguir:

| Ofereço a meu filho | Que quantidade destes líquidos seu bebê toma ao dia? (em ml) |
| --- | --- |
| Água |  |
| Sucos de frutas ou bebidas com frutas |  |
| Bebidas com ervas (chás) |  |
| Refrigerante |  |
| Outros (explique) |  |

1. a) Que alimentos seu filho ingere diariamente? (assinalar todos os que se aplicam)

|  | Tamanho da porção ingerida |
| --- | --- |
| Cereais e grãos, como cereais para bebês, cereais usados no café da manhã, pão, arroz, massas |  |
| Vegetais e frutas |  |
| Carne, peixe, frango ou outros, como ovos, queijo tofu, frango, ovos, lentilhas ou outros legumes |  |
| Laticínios como queijo, iogurte, pudim, sorvete |  |

b) Qual a textura dos alimentos ingeridos por seu filho?

Alimento para bebês em potinhos ou alimentos feitos em casa, batidos ou transformados em purê

Cortados em pedaços pequenos, do tamanho de carne moída; isto é denominado de picado ou moído

Cortado em pedaços pequenos ou cubos (denominado cortado em cubos)

1. a) Descreva a palavra que melhor descreve o apetite de seu filho

Excelente Bom Razoável Insatisfatório

b) Em comparação à alimentação habitual de seu filho, seus hábitos alimentares mudaram nos últimos dias?

Não

Sim → Houve: Aumento? Diminuição?

Há quanto tempo ocorreu esta mudança? (dias, semanas ou meses)

1. Seu filho tem alguns dos seguintes problemas de alimentação? (assinalar todos os que se aplicam)

|  | não | sim |
| --- | --- | --- |
| Problemas com sugar, engolir, mastigar ou morder |  |  |
| Choro, engasgamento, tosse, reflexo de vômito durante refeição ou ao ver alimentos ou mamadeira |  |  |
| Seu filho recusa alimentos, escondendo o rosto em seu ombro, arqueando as costas ou mordendo a colher, etc. |  |  |
| Recusa-se a engolir o alimento |  |  |
| Recusa a ingestão de alimentos contendo pedaços de comida (tem medo ou não gosta de alimentos com textura) |  |  |
| Alergias ou intolerâncias a alimentos, dietas especiais: (Explicar) |  |  |
| Outros: (Explicar) |  |  |

1. Outro membro da família necessita de dieta especial?

Não

Sim → (Explique)

Seu filho também usa esta dieta especial? Não Sim

1. Atualmente, seu filho apresenta problemas gastrointestinais que restringem sua alimentação líquida ou sólida? (assinalar cada problema existente)

| Problema | Nunca ou quase nunca | A cada2-3 dias | Diariamente | Há quanto tempo seu filho apresenta este problema? | |
| --- | --- | --- | --- | --- | --- |
| < 2 semanas | ≥ 2 semanas |
| Perda ou falta de apetite (anorexia) |  |  |  |  |  |
| Vômito ou regurgitação |  |  |  |  |  |
| Diarreia |  |  |  |  |  |
| Constipação |  |  |  |  |  |

1. a) Por favor, assinale a palavra que melhor descreve o grau de energia ou atividade de seu filho:

alto médio baixo

b) Comparando com o grau de energia ou atividade habitualmente demonstrado por seu filho, houve alguma mudança recente?

Não

Sim→ Aumentou? Diminuiu?

Há quanto tempo sua atividade ou energia aumentou ou diminuiu? (em dias, semanas ou meses)

**EXAME FÍSICO – LACTENTES E CRIANÇAS MENORES DE DOIS ANOS**

O exame físico apoia e acrescenta os dados obtidos na história. Observar áreas em que normalmente há tecido adiposo e massa muscular, verificando se ocorreram perdas significativas.

1. **ATROFIA**

Falta de tecido adiposo indica grave déficit de energia. As bochechas estão acentuadas e a face está redonda bem formada? Ou a gordura facial está diminuída e o rosto parece achatado e estreito? Os braços são bem formados e roliços, sendo difícil pinçar a pele na área do tríceps ou do cotovelo ou a pele parece solta, sendo facilmente afastada nestas áreas do cotovelo ou tríceps? O tórax é bem formado e as costelas não estão aparentes ou há proeminência das costelas com perda óbvia de tecido intercostal? Os coxins de gordura nos glúteos estão bem formados e arredondados ou quase não se vê gordura nos glúteos, estando a pele muito enrugada? As pernas são bem formadas, roliças ou são magras com pele solta na coxa e panturrilha?

| Local | Sem Atrofia | Atrofia Moderada | Atrofia grave |
| --- | --- | --- | --- |
| Têmporas |  |  |  |
| Bochechas |  |  |  |
| Braços |  |  |  |
| Tórax |  |  |  |
| Nádegas |  |  |  |
| Pernas |  |  |  |

1. **EDEMA (relacionado à nutrição)**

A presença de edema depressível com cacifo nos tornozelos ou sacro pode indicar a presença de hipoproteinemia, mas comorbidades (como insuficiência renal ou insuficiência cardíaca congestiva) modificam o significado dos sinais clínicos. A presença de edema também deveria ser considerada na avaliação de mudanças do peso corporal.

| Local | Ausente | Moderado | Grave |
| --- | --- | --- | --- |
| Área do sacro (bebês sempre deitados de costas) |  |  |  |
| Pés ou tornozelos (bebês ativos que se movimentam) |  |  |  |

3. Outros sinais físicos observados que possam sugerir desnutrição:
