# Supplementary material
Source: Elsevier journal article supplement (https://www.sciencedirect.com/science/article/pii/S0021755715000984)
Supplement: mmc2 [file S0021755715000984:mmc2.docx]

**ANEXO B:** Questionário de ANSG para crianças maiores de dois anos e adolescentes

1. a) Quando foi medido a altura e o peso seu/do seu filho pela última vez?

b) Qual era o peso seu/do seu filho?

c) Qual era a altura sua/do seu filho?

d) Qual a altura da mãe e do pai da criança?

1. Atualmente, quantas refeições você/seu filho faz por dia? 3 2 1 0

Quantos lanches você/seu filho faz por dia? 3 2 1 0

1. Que tipos de alimentos você e seu filho comem no dia-a-dia? (assinalar todos os que se aplicam):

Cereais e grãos, como pães (pãozinho francês, pão árabe, pão indiano - roti), arroz e massas

Frutas e legumes

Carne, peixe, frango ou outros (ovos, soja, tofu, lentilhas ou leguminosas)

Leite e laticínios, como queijo, iogurte, pudim, sorvete

# a) Favor assinalar a palavra que melhor descreve o apetite de seu filho:

Excelente Bom Razoável Insuficiente

b) Em comparação à sua alimentação e à de seu filho, houve alguma mudança recente?

Não

Sim → Houve: Aumento? Diminuição?

Há quanto tempo ocorreu esta modificação? (em dias, semanas ou meses)

1. Alguns dos seguintes problemas de alimentação atrapalham seu filho? (assinalar todos os que se aplicam)

|  | sim | não |
| --- | --- | --- |
| Problemas ao mastigar, engolir, engasgamento, tosse, ânsia de vômito |  |  |
| Comportamentos inadequados relacionados à alimentação atrapalham a família ou outros nas refeições |  |  |
| “Não quero comer” / “Não estou com fome” |  |  |
| “Não quero mais comer, estou satisfeito após algumas garfadas” |  |  |
| Alergias ou intolerância a alimentos, dietas especiais: (Especificar)  Se SIM → Poderia comer em maior quantidade, se não tivesse estas alergias ou necessidade de dieta especial? |  |  |
| Outros: (Especificar) |  |  |

# Por favor, descreva os alimentos que você/seu filho normalmente come (alimentos sólidos e bebidas, indicando as quantidades)

| Café da manhã | Almoço | Janta |
| --- | --- | --- |
| Lanche | Lanche | Lanche |

1. Algum outro membro de sua família necessita de dieta especial?

Não

Sim → (Explique)

Você ou seu filho também usam esta dieta? Não Sim

1. Você tentou mudar o que come e bebe sozinho, sem ajuda de outra pessoa?

Não

Sim → Como?

1. Atualmente, você e/ou seu filho têm problemas gastrointestinais que restringem o que pode comer ou beber? (assinalar cada um dos sintomas)

| Sintoma | Nunca/ Quase nunca | A cada2-3 dias | Diariamente | Há quanto tempo seu filho tem estes sintomas? | |
| --- | --- | --- | --- | --- | --- |
| < 2 semanas | ≥2semanas |
| Dor de estômago |  |  |  |  |  |
| Falta ou perda de apetite (anorexia) |  |  |  |  |  |
| Sensação de vômito (Náusea) |  |  |  |  |  |
| Vômito ou refluxo |  |  |  |  |  |
| Diarreia |  |  |  |  |  |
| Constipação (↓freqüência; fezes secas e duras) |  |  |  |  |  |

1. Favor assinalar todas as afirmações que se aplicam a você/seu filho:

a) Eu/meu filho vamos à escola em tempo integral

Eu/meu filho vamos à escola só em um turno:

Porque eu/meu filho cansamos, se for à escola em tempo integral.

Por outros motivos: (Explicar)

Eu/meu filho não vamos à escola:

Porque eu/meu filho estamos muito cansados

Por outros motivos: (Explicar)

b) Eu/ meu filho tem muita energia para correr e brincar ou fazer atividades esportivas com amigos ou colegas da escola.

Eu/meu filho canso logo e não consigo acompanhar quando meus/seus amigos ou colegas de escola correm, jogam ou participam de esportes.

Eu/meu filho se sente cansado ou fraco ao subir escadas.

Eu/meu filho caminho dentro de casa, mas eu/meu filho se sente fraco demais para grandes caminhadas fora de casa

c) Eu/meu filho durmo o tempo normal.

Eu/ meu filho durmo mais do que o habitual.

Eu/meu filho preciso passar a maior parte do dia de repouso, na cama, no sofá ou em cadeira de rodas.

d) As respostas a, b e c descrevem o estado habitual seu/do seu filho?

Sim

Não → Houve: Aumento? Diminuição?

Há quanto tempo houve aumento ou diminuição? (em dias, semanas ou meses)

**EXAME FÍSICO – CRIANÇAS MAIORES DE DOIS ANOS E ADOLESCENTES**

O exame físico apóia e acrescenta os dados obtidos na história. Observar áreas em que normalmente há tecido adiposo e massa muscular, verificando se ocorreram perdas significativas.

**1. GORDURA SUBCUTÂNEA**

Perda bem demonstrada e clara de tecido adiposo indica grave déficit de energia. Procure músculos ou ossos claramente delineados: os músculos dos membros superiores estão bem delineados quando há perda de gordura.

As bochechas estão redondas ou magras (perda de gordura)? Pince a pele no bíceps e tríceps, verificando se há tecido adiposo entre seu polegar e outro dedo. Há depressões entre as costelas inferiores? As nádegas são arredondadas e bem formadas ou atrofiadas (falta de gordura)?

| Local | **Sem perda** | Perda moderada | **Perda Grave** |
| --- | --- | --- | --- |
| Bochechas |  |  |  |
| Bíceps |  |  |  |
| Tríceps |  |  |  |
| Costelas |  |  |  |
| Nádegas |  |  |  |

1. **MASSA MUSCULAR**

Avalie locais em que há reserva de músculos, examinando da cabeça às pernas. A atrofia muscular é avaliada pela observação dos ossos proeminentes nas áreas da clavícula, ombros (perda dos músculos deltóides), escápula e joelhos, além da magreza do quadríceps ou das panturrilhas, com falta de massa e tônus muscular.

Obs.: A atrofia muscular pode ser decorrente de doenças neurológicas ou musculares.

| Local | **Sem perda** | Perda moderada | **Perda Grave** |
| --- | --- | --- | --- |
| Têmpora |  |  |  |
| Clavícula |  |  |  |
| Ombro |  |  |  |
| Escápula |  |  |  |
| Quadríceps |  |  |  |
| Panturrilha |  |  |  |

1. **EDEMA (relacionado à nutrição).**

A presença de edema depressível com cacifo nos tornozelos ou sacro podem indicar a presença de hipoproteinemia, mas comorbidades como insuficiência renal ou insuficiência cardíaca congestiva também podem explicar estes sinais.

A presença de edema também deve ser observada quando se avalia alterações do peso corporal.

| **Local** | **Ausente** | Moderado | Grave |
| --- | --- | --- | --- |
| Pé, tornozelos (paciente que caminha e se movimenta) |  |  |  |
| Área sacral (paciente com atividade restrita ou acamado) |  |  |  |

1. Outros sinais físicos observados que sugerem desnutrição:
