# Supplementary material
Source: Elsevier journal article supplement (https://www.sciencedirect.com/science/article/pii/S0021755715000984)
Supplement: mmc3 [file S0021755715000984:mmc3.docx]

ANEXO C: Classificação do estado nutricional do ANSG

| **HISTÓRIA MÉDICA** | **CLASSIFICAÇÃO ANSG** | | |
| --- | --- | --- | --- |
| **Normal** | **Moderado** | **Grave** |
| **Adequação da estatura para idade (*stunting*)**  a)Percentil estatura: _____ ≥ 3 < 3 << 3  Escore-z: _____ |  |  |  |
| b) Adequado em relação a estatura dos pais?: sim não |  |  |  |
| c) Crescimento: seguindo o percentil (ascendente)  estático ou diminuiu no percentil  diminuiu muito no percentil |  |  |  |
| **Adequação de peso para estatura (*wasting*)**  a) Peso corporal ideal = ______ kg  b) Porcentagem do peso corporal ideal: __ __ __ %  ≥ 120% 110-119% 90-109% 80-89% <79% |  |  |  |
| **Mudanças não intencionais no peso corporal (*wasting*)**  a) Peso*: seguindo o percentil  estático ou diminuiu no percentil  diminuiu muito no percentil |  |  |  |
| b) Perda de peso: nenhuma  perda de < 5% peso usual  perda de ≥ 5 % peso usual |  |  |  |
| c) Mudanças nas ultimas 2 semanas: sem mudanças aumentou diminuiu |  |  |  |
| **Adequação do consumo alimentar**  a) Consumo alimentar: adequado  inadequado - hipocalórico  inadequado - baixa ingestão ou quase nada |  |  |  |
| b) Consumo usual versus atual: sem mudanças aumentou diminuiu |  |  |  |
| c) Duração da mudança: < 2 semanas ≥ 2 semanas |  |  |  |
| **Sintomas gastrointestinais**  a) sem sintomas  um sintoma ou mais, não diariamente  vários sintomas, diariamente |  |  |  |
| b) Duração dos sintomas: < 2 semanas ≥ 2 semanas |  |  |  |
| **Capacidade funcional (relacionado à nutrição)**  a) sem prejuízo, capaz de realizar atividades apropriadas para a idade  restrita em atividades extenuantes, mas capaz de realizar atividades da escola e brincadeiras de natureza leve ou sedentária, menos energia e se cansa com frequência  pouca ou nenhuma atividade ou brincadeira, restrito ao leito ou cadeira > 50% do tempo que passa acordado; sem energia, dorme bastante |  |  |  |
| b) Função nas últimas 2 semanas: sem mudança aumentou diminuiu |  |  |  |
| **Estresse metabólico da doença**  sem estresse estresse moderado estresse severo |  |  |  |
| **EXAME FÍSICO** | **Normal** | **Moderado** | **Grave** |
| **Perda de gordura subcutânea**  sem perda na maioria das áreas  perda em algumas áreas  perda severa na maioria ou em todas as áreas |  |  |  |
| **Perda de massa muscular**  sem perdas na maioria das áreas  perda em algumas áreas  perda severa na maioria ou em todas as áreas |  |  |  |
| **Edema (relacionado à nutrição)**  sem edema  edema moderado  edema severo |  |  |  |

**ORIENTAÇÕES PARA AGREGAR ITENS NO ESCORE GLOBAL**

Na atribuição de um escore global, considere todos os itens no contexto de cada um. Dê mais consideração para mudanças no ganho de peso e crescimento, consumo alimentar e sinais físicos de perda de gordura ou massa muscular. Use os demais itens para apoiar ou reforçar esta classificação. Analise as mudanças recentes dentro do contexto do estado usual/crônico do paciente. O paciente iniciou com um estado nutricional normal ou comprometido?

**Normal/bem nutrido**

Esta criança está crescendo e ganhando peso normalmente, tem um consumo alimentar adequado sem sintomas gastrointestinais, mostra pouco ou nenhum sinal de desperdício e com capacidade funcional normal. Classificação normal na maioria ou em todas as categorias.

**Moderadamente desnutrido**

Esta criança tem sinais definidos de um decréscimo no peso e/ou crescimento e consumo alimentar, pode ou não ter sinais de depósitos de gordura, massa muscular e capacidade funcional diminuídos. Este paciente está vivenciando uma piora do estado nutricional, porém partiu de um estado nutricional adequado. A classificação moderada foi utilizada na maioria ou em todas as categorias, com potencial de progredir para um estado de desnutrição severa.

**Gravemente desnutrido**

Este paciente tem um quadro de desnutrição progressiva com uma tendência descendente na maioria ou em todos os fatores. Existem sinais físicos significantes de desnutrição – perda de depósitos de gordura, perda de massa muscular, perda de peso ≥ 5% - assim como um decréscimo no consumo alimentar, perdas gastrointestinais excessivas e/ou estresse metabólico agudo e perda de capacidade funcional. Classificação grave na maioria ou em todas as categorias com pequeno ou nenhum sinal de melhora.

| **CLASSIFICAÇÃO GERAL ANSG** | Bem Nutrido | Moderado Desnutrido | Gravemente Desnutrido |
| --- | --- | --- | --- |
